# Supplementary material
Source: PubMed Central journal article supplement (PMC6348132)
Supplement: NIHMS1509687-supplement-1.pdf [file NIHMS1509687-supplement-1.pdf]

**Supplemental Table 1.** Post-hoc analysis of discharge disposition location among patients discharged directly from CVICU

| <b>Discharge Disposition Location (n / %)</b> | <b>Baseline Period</b> | <b>QI Period</b> |
|-----------------------------------------------|------------------------|------------------|
| Inpatient rehabilitation facility             | 2 / 13.3               | 4 / 14.8         |
| Long-term acute care hospital                 | 2 / 13.3               | 5 / 18.5         |
| Other acute care hospital                     | 2 / 13.3               | 5 / 18.5         |
| Expired                                       | 9 / 60.0               | 13 / 48.2        |
| Total                                         | 15                     | 27               |
